# Supplementary material
Source: Springer Nature journal article supplement (https://www.springermedizin.de/resource/supplementary/12967_2013_1659_MOESM1_ESM.pdf/9574562)
Supplement: MOESM1 [file 9574562]

# **Detection of serological biomarkers by Proximity Extension Assay for detection of colorectal neoplasias in symptomatic individuals**

Stine Buch Thorsen<sup>1,a</sup>, Martin Lundberg<sup>2,a</sup>, Andrea Villablanca<sup>2</sup>, Sarah Tangsgaard<sup>1</sup>, Kirstine Christensen Belling<sup>3</sup>, Birgitte Sander Nielsen<sup>1</sup>, Mick Knowles<sup>4</sup>, Nick Gee<sup>4</sup>, Hans Jørgen Nielsen<sup>5</sup>, Nils Brünner<sup>1</sup>, Ib Jarle Christensen<sup>6</sup>, Simon Fredriksson<sup>2</sup>, Jan Stenvang<sup>1,b,\*</sup> and Erika Assarsson<sup>2,b</sup>

<sup>a</sup>Shared authorship

<sup>b</sup>Shared senior authorship

<sup>1</sup>Department of Veterinary Disease Biology, Faculty of Health and Medical Sciences, University of Copenhagen, Strandboulevarden 49, DK-2100, Copenhagen, Denmark

<sup>2</sup>Olink Bioscience, Uppsala Science Park, Dag Hammarskjölds väg 52B, SE-75237 Uppsala, Sweden

<sup>3</sup>Department of Systems Biology Center for Biological Sequence Analysis, Technical University of Denmark DTU, DK-2800 Kgs. Lyngby, Denmark

<sup>4</sup>Innova Biosciences, Babraham Hall, Cambridge, CB22 3AT, United Kingdom

<sup>5</sup>Department of Surgical Gastroenterology, Hvidovre Hospital, DK-2650 Hvidovre, Denmark

<sup>6</sup>The Finsen Laboratory, Rigshospitalet, DK-2200 Copenhagen N, Denmark and Biotech Research and Innovation Center (BRIC), University of Copenhagen, DK-2200 Copenhagen N, Denmark

\*To whom correspondence should be addressed: Jan Stenvang, Tel: +45 35333753; Fax : +45  
35332755; Email: [stenvang@sund.ku.dk](mailto:stenvang@sund.ku.dk)

## **Additional Materials**

addFigure 1 – Specificity test in chicken plasma

addFigure 2 – Linearity in human CRC plasma (n=1)

addTable 1 – All 74 biomarkers and controls divided into panels

addTable 2 – Oligonucleotide and qPCR primer sequence design. List of 3' and 5' oligonucleotide sequences used for antibody conjugations forming PEA probes along with hybridization oligonucleotide, extension oligo and primer sequences for pre-amplification and quantitative real-time PCR.

addTable 3. Recovery (%) for nine of the PEA assays after technology transfer. Recovery is presented for all assays of which a commercial antigen was available.

addTable 4 – Antigen mixes.

addTable 5 – Correlation Coefficients between ELISA/PLA and ELISA/PEA

addTable 6. PLA- and PEA correlations

addTable 7 – Intra-variation

addFigure 1 – Specificity test in chicken plasma. The signal in buffer (PBS + 0.1% BSA) in comparison to the signal in chicken plasma. The y-axis shows Cp-values and no differences were observed among the signals for the individual assays when buffer and chicken plasma was compared. This indicates that the assays possess very low biological background cross-reactivity and demonstrates no unspecific binding to the biological components of chicken plasma for the antibodies and oligonucleotides of the PEA assays.

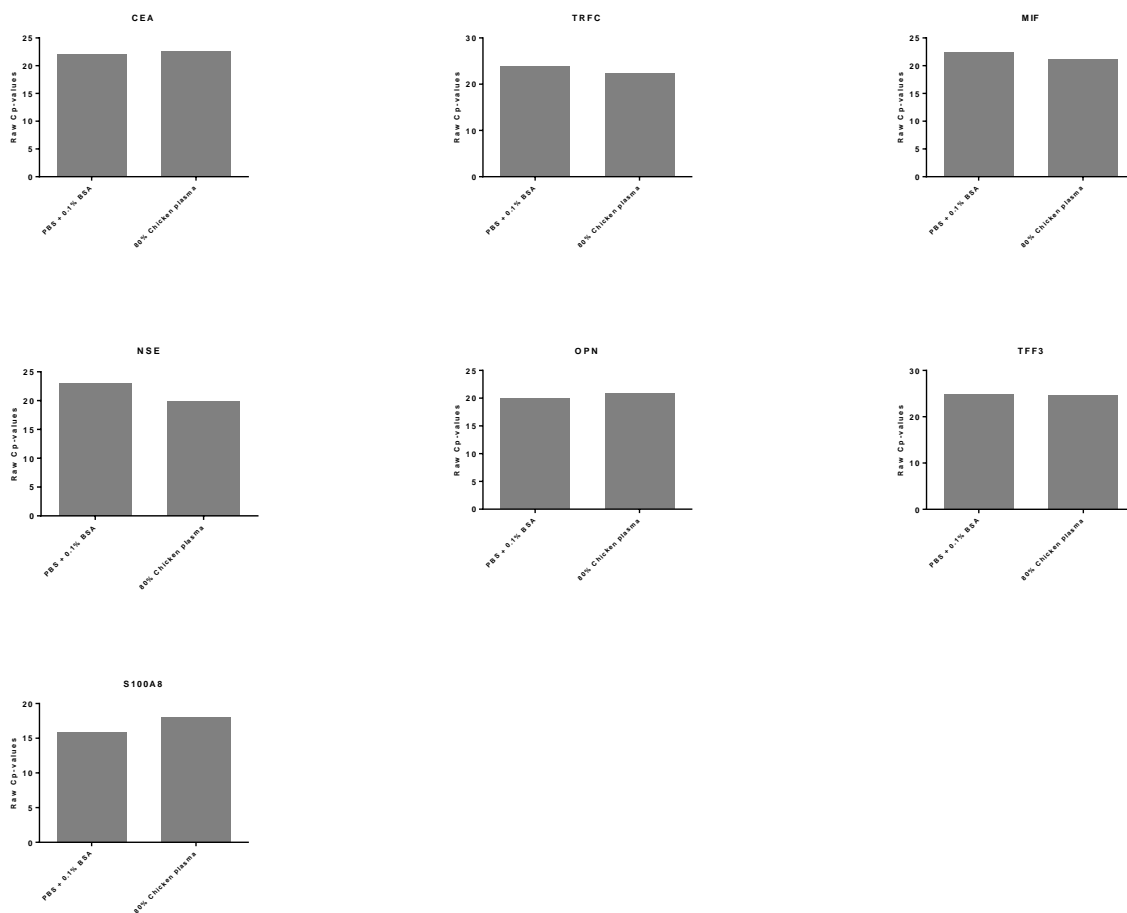

addFigure 2 – Linearity in human CRC plasma (n=1). The x-axis shows the dilution factor of the sample. The y-axis shows the Cp-values, which were normalized to the internal control GFP by subtracting each biomarker value from the corresponding GFP-value for each sample. The ideal plasma dilution for the CRC sample is 10, which is within the linear range of the present 11 potential markers. TIMP-1 was excluded due to a technical issue.

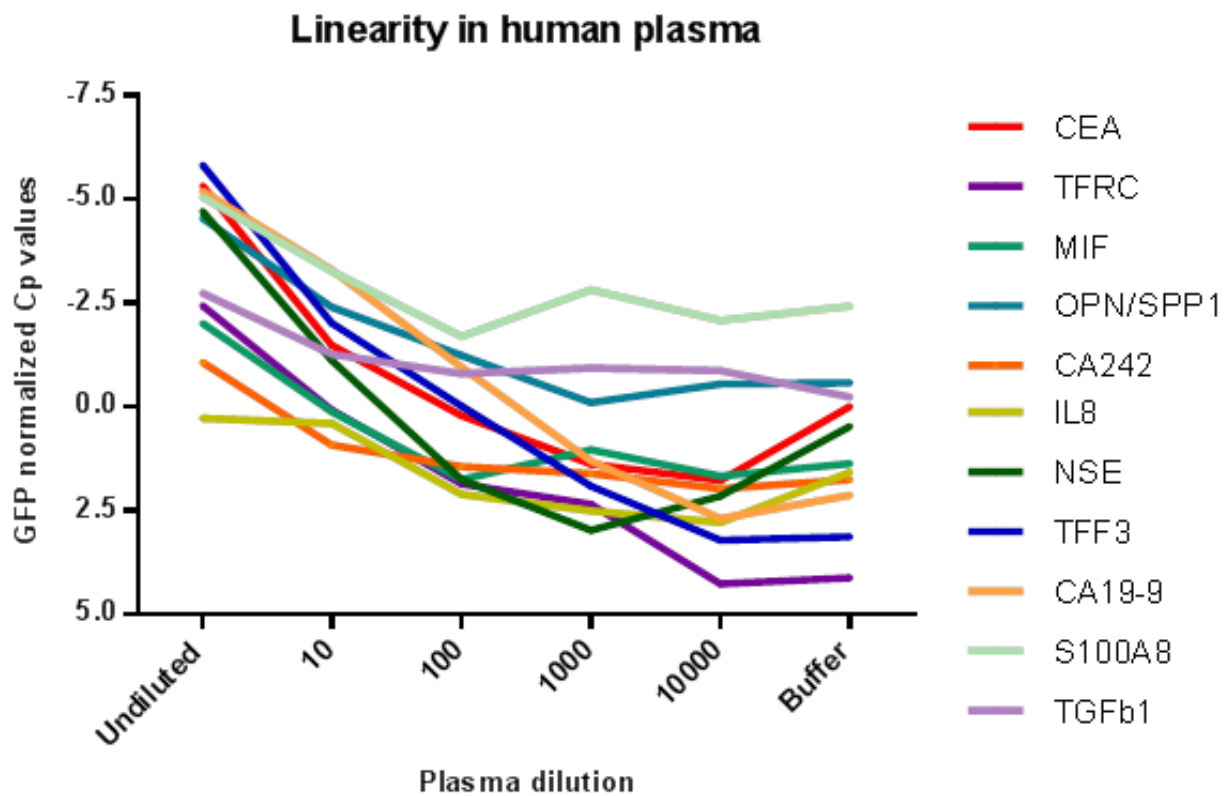

addTable 1

| Seq No | Panel 1 Marker        | Antibody Supplier | Catalog ID#1/<br>Catalog ID#2 | Uniprot ID |
|--------|-----------------------|-------------------|-------------------------------|------------|
| 1      | Carbonic Anhydrase IX | RnD systems       | AF2188                        | Q16790     |
| 2      | MCP-1 (CCL2)          | RnD systems       | AF279-NA                      | P13500     |
| 3      | Mesothelin            | RnD systems       | AF3265                        | Q13421     |
| 4      | IL-6                  | RnD Systems       | AF-206-NA                     | P05231     |
| 5      | No assay              | RnD Systems       | AF2286                        | -          |
| 6      | FAM3D                 | RnD systems       | AF2869                        | Q96BQ1     |
| 7      | CEACAM 5 pAb          | RnD systems       | AF4128                        | P06731     |
| 8      | VEGF                  | RnD systems       | AF-293-NA                     | P15692     |
| 9      | No assay              |                   |                               | -          |
| 10     | No assay              |                   |                               | -          |
| 11     | CEA mAb               | USBio             | C1300-02/C1300-07             | P06731     |
| 12     | CA125                 | FDAB              | 22582 ov197/22781 ov185       | -          |
| 13     | Her4/erbB-4           | RnD systems       | AF1131                        | Q15303     |
| 14     | HGF/SF                | RnD systems       | AF-294-NA                     | P08581     |
| 15     | FABP2                 | RnD systems       | AF3078                        | P12104     |
| 16     | Oligo PCR             | -                 | -                             | -          |
| 17     | APC                   | Novus             | NB100-78112                   | -          |
| 32     | GFP                   | RnD systems       | AF4240                        | -          |
| 35     | IL8                   | RnD systems       | AF-208-NA                     | P10145     |
| 38     | PE                    | Abcam             |                               | -          |
| 45     | Her2/ERBB2            | RnD systems       | AF1129                        | P04626     |
| 51     | Her3                  | RnD systems       | AF234                         | P21860     |
| 53     | TNFa                  | RnD systems       | AF-210-NA                     | P01375     |
| 57     | IL-1a                 | RnD systems       | AF-200-NA                     | P01583     |

| Seq No | Panel 2 Marker       | Antibody Supplier | Catalog ID#1/<br>Catalog ID#2 | Uniprot ID |
|--------|----------------------|-------------------|-------------------------------|------------|
| 1      | Survivin             | RnD systems       | AF6471                        | Q15392     |
| 2      | Desmin               | RnD systems       | AF3844                        | P17661     |
| 3      | HGF R/cMET           | RnD systems       | AF276                         | P08581     |
| 4      | IL-17                | RnD systems       | AF177                         | Q9NRM6     |
| 5      | IL-23                | RnD systems       | AF1716                        | Q9NPF7     |
| 6      | FoxP3                | RnD Systems       | AF3240                        | Q9B251     |
| 7      | CEACAM 5 pAb         | RnD systems       | AF4128                        | P06731     |
| 8      | CEACAM1              | RnD systems       | AF2244                        | P13688     |
| 9      | TGFb1                | RnD systems       | AF-246-NA                     | P01137     |
| 10     | TGFb3                | RnD systems       | AF-243-NA                     | P10600     |
| 11     | KLK3 (PSA)           | RnD systems       | AF1344                        | P07288     |
| 12     | Cystatin SN          | RnD systems       | AF1285                        | P01037     |
| 13     | Prolactin            | RnD systems       | AF682                         | P01236     |
| 14     | DcR3                 | RnD systems       | AF142                         | O95407     |
| 15     | IL8                  | RnD systems       | AF-208-NA                     | P10145     |
| 16     | Oligo PCR            | -                 | -                             | -          |
| 17     | APC                  | Novus             | NB100-78112                   | -          |
| 32     | GFP                  | RnD systems       | AF4240                        | -          |
| 35     | CTGF                 | RnD systems       | AF660                         | P29279     |
| 38     | PE                   | Abcam             |                               | -          |
| 45     | GDNF                 | RnD systems       | AF-212-NA                     | P39905     |
| 51     | Fractalkine (CX3CL1) | RnD systems       | AF365                         | P78423     |
| 53     | MIP-1                | RnD systems       | AF-270-NA                     | P10147     |
| 57     | CA 242               | FDAB              | C241 B24645/C242 B24650       | NA         |

| Seq No | Panel 3 Marker              | Antibody Supplier                                                   | Catalog ID#1/<br>Catalog ID#2                                                                                                          | Uniprot ID |
|--------|-----------------------------|---------------------------------------------------------------------|----------------------------------------------------------------------------------------------------------------------------------------|------------|
| 1      | Spondin-2/Midin             | RnD systems                                                         | AF2188                                                                                                                                 | Q9BUD6     |
| 2      | EPCAM                       | RnD systems                                                         | AF960                                                                                                                                  | P16422     |
| 3      | NSE (enolase 2)             | RnD systems                                                         | AF5169                                                                                                                                 | P09104     |
| 4      | Transaldolase 1             | Sigma Aldrich                                                       | SAB1400273                                                                                                                             | P37837     |
| 5      | No assay                    |                                                                     |                                                                                                                                        | -          |
| 6      | Galectin-3                  | RnD systems                                                         | AF1154                                                                                                                                 | P17931     |
| 7      | TIMP1                       | RnD systems                                                         | AF970                                                                                                                                  | P01033     |
| 8      | EGFR                        | RnD systems                                                         | AF231                                                                                                                                  | P00533     |
| 9      | TFF3                        | RnD systems                                                         | AF4407                                                                                                                                 | Q07654     |
| 10     | u-PA                        | RnD systems                                                         | AF1310                                                                                                                                 | P00749     |
| 11     | CEA mAb                     | Stratech (UK)                                                       | <a href="http://www.stratech.co.uk/shopexd.asp?id=144884&amp;bc=no">http://www.stratech.co.uk/<br/>shopexd.asp?id=144884&amp;bc=no</a> | P06731     |
| 12     | Transferrin Receptor (CD71) | RnD systems                                                         | AF2474                                                                                                                                 | P02786     |
| 13     | CA 15.3                     | FDAB                                                                | 22480 Ma552/22637 Ma695                                                                                                                | NA         |
| 14     | CA19-9                      | FDAB                                                                | c192 Mab 103-01                                                                                                                        | NA         |
| 15     | Tropomyosin                 | <a href="http://antibodies.sdix.com">http://antibodies.sdix.com</a> | 2272.00.02                                                                                                                             | P06753     |
| 16     | Oligo PCR                   | -                                                                   | -                                                                                                                                      | -          |
| 17     | APC                         | Novus                                                               | NB100-78112                                                                                                                            | -          |
| 32     | GFP                         | RnD systems                                                         | AF4240                                                                                                                                 | -          |
| 35     | OPN                         | RnD systems                                                         | AF1433                                                                                                                                 | P10451     |
| 38     | PE                          | Abcam                                                               |                                                                                                                                        | -          |
| 45     | MIF                         | RnD systems                                                         | AF-289-PB                                                                                                                              | P14174     |
| 51     | No assay                    |                                                                     |                                                                                                                                        | -          |
| 53     | SLPI                        | RnD systems                                                         | AF1274                                                                                                                                 | P03973     |
| 57     | S100A8                      | RnD systems                                                         | AF4570                                                                                                                                 | P05109     |

| Seq No | Panel 4 Marker  | Antibody Supplier | Catalog ID#1/<br>Catalog ID#2 | Uniprot ID |
|--------|-----------------|-------------------|-------------------------------|------------|
| 1      | Clusterin       | RnD systems       | AF2188                        | P10909     |
| 2      | No assay        |                   |                               | -          |
| 3      | sP-selectin     | RnD systems       | AF137                         | Q14242     |
| 4      | MMP-2           | RnD Systems       | AF902                         | P08253     |
| 5      | MMP-9           | RnD Systems       | AF911                         | P14780     |
| 6      | Tenascin-C      | RnD systems       | AF3358                        | P24821     |
| 7      | TIMP1           | RnD systems       | AF970                         | P01033     |
| 8      | CRP             | RnD systems       | AF1707                        | P02741     |
| 9      | PAI-1 / Serpin  | RnD systems       | AF1786                        | P05121     |
| 10     | sVCAM/CD106     | RnD systems       | AF809                         | P19320     |
| 11     | IGF-I           | RnD systems       | AF291                         | P08069     |
| 12     | Cathepsin B     | RnD systems       | AF953                         | P07858     |
| 13     | Angiogenin      | RnD systems       | AF265                         | P03950     |
| 14     | IGF2            | RnD systems       | AF2447                        | P11717     |
| 15     | Tetranectin     | RnD systems       | AF5170                        | P05452     |
| 16     | Oligo PCR       | -                 | -                             | -          |
| 17     | APC             | Novus             | NB100-78112                   | -          |
| 32     | GFP             | RnD systems       | AF4240                        | -          |
| 35     | Cystatin C      | RnD systems       | AF1196                        | P01034     |
| 38     | PE              | Abcam             |                               | -          |
| 45     | IGFBP-1         | RnD Systems       | AF871                         | P08833     |
| 51     | GRP78/HSPA5/BiP | RnD Systems       | AF4846                        | P11021     |
| 53     | Kallikrein 11   | RnD systems       | AF1595                        | Q9UBX7     |
| 57     | YKL-40          | RnD systems       | AF2599                        | P36222     |

addTable 2

| Oligonucleotide design |                                           |                                             |
|------------------------|-------------------------------------------|---------------------------------------------|
| Mux sequence           | Sequence as 3' oligo                      | Sequence as 5' oligo                        |
| 1                      | CAGGTAGTAGTACGICTGTTTACGATGAGACTGGATGAA   | TCACGGTAGCATAAGGTGCAAGATAATACTCTCGCAGCAC    |
| 2                      | GGCCTCCTCAAATTAAGAATTCACGATGAGACTGGATGAA  | TCACGGTAGCATAAGGTGCAAGTACCCAAATAACGGITCAC   |
| 3                      | GGATCACTCCAAGTACTGACTATCAGATGAGACTGGATGAA | TCACGGTAGCATAAGGTGCAAGTTATATCTGCCACTGTACAC  |
| 4                      | AGAGTCCACTTCCATAATGTACGATGAGACTGGATGAA    | TCACGGTAGCATAAGGTGCAAGGTAAGTGTAGCAGTAGITC   |
| 5                      | CTACGACTAGGAGATAGATGTACGATGAGACTGGATGAA   | TCACGGTAGCATAAGGTGCAAGTTATGTATAGTACGCTCGC   |
| 6                      | CCCTCGTACACAAATGGATAATTCAGATGAGACTGGATGAA | TCACGGTAGCATAAGGTGCAAGTAACTAGGTCGATCTGCCTGC |
| 7                      | GACTCCACTTCTTGTAAATGTACGATGAGACTGGATGAA   | TCACGGTAGCATAAGGTGCAAGGCACTGTAGTATAAACTC    |
| 8                      | CAGACGGTCAAAATCCTCTAATTCAGATGAGACTGGATGAA | TCACGGTAGCATAAGGTGCAAGTATCCCTAGTACGGCAAC    |
| 9                      | GAGGTAGCTCACTCCACATGTACGATGAGACTGGATGAA   | TCACGGTAGCATAAGGTGCAAGTGTCCGCTAATTCGCAAGC   |
| 10                     | GTCTAAGATCCTATCACACGTACGATGAGACTGGATGAA   | TCACGGTAGCATAAGGTGCAAGGTGCCACTTACTAAACAAC   |
| 11                     | TTGCCACTGGTCTGAAATGGTCAAGATGAGACTGGATGAA  | TCACGGTAGCATAAGGTGCAAGTAAAGCCACTTCAACGCAG   |
| 12                     | ATCAGGTCTGGAAGATTACGTACGATGAGACTGGATGAA   | TCACGGTAGCATAAGGTGCATAGTCTCAGCATTATCAGC     |
| 13                     | AGCCTACTTTCACGATTTGTTACGATGAGACTGGATGAA   | TCACGGTAGCATAAGGTGCATAATGTCTGTGTAAGCCCGC    |
| 14                     | CTTTCAGAGGTCAAGGTGATTCACGATGAGACTGGATGAA  | TCACGGTAGCATAAGGTGCAAGGCCACAGGATTTCTAAATAC  |
| 15                     | ACGACTCTAGCATGTCTACGTACGATGAGACTGGATGAA   | TCACGGTAGCATAAGGTGCAAGCCATATCACATTAACCTGC   |
| 16                     |                                           |                                             |
| 17                     | CCCCTAAGAGATATTGGTATTCAGATGAGACTGGATGAA   | TCACGGTAGCATAAGGTGCAATTCAGTCTCTGGAAGGGTTC   |
| 32                     | TGAGTATCACTTCTCTACGTACGATGAGACTGGATGAA    | TCACGGTAGCATAAGGTGCAAGATGTACCCATATTCTCGC    |
| 35                     | GGCCCAAGTGTAAATTTGCTTACGATGAGACTGGATGAA   | TCACGGTAGCATAAGGTGCAAGTATGAGAACTTCGCTACAG   |
| 38                     | GCCCAATGTCCAATAGCTTATTCAGATGAGACTGGATGAA  | TCACGGTAGCATAAGGTGCAAGATCATACGTCTTACAAC     |
| 45                     | CGGCGCATCTGTATCTAGTTCACGATGAGACTGGATGAA   | TCACGGTAGCATAAGGTGCACAGTAAACGATGTATCCACAG   |
| 51                     | GGCTCCCATGTGGAATTAATTCAGATGAGACTGGATGAA   | TCACGGTAGCATAAGGTGCATAAGCTGATTTGTCTGCTACGG  |
| 53                     | CCTCGCTCGAGTATAAATATTCAGATGAGACTGGATGAA   | TCACGGTAGCATAAGGTGCAAGGCATAAGACTTCGTATCAG   |
| 57                     | CGAAGGCTAGTCCAAATTTGTACGATGAGACTGGATGAA   | TCACGGTAGCATAAGGTGCAATCTGATCCACTGCCGTATA    |



Primer sequences

| Mux sequence | Rew qPCR               | Frw qPCR                | Rew Pre-AMP              | Frw Pre-AMP                 |
|--------------|------------------------|-------------------------|--------------------------|-----------------------------|
| 1            | CGTGCTGCGAGAGTATTATCT  | CCAGGTAGTAGTACGCTCTGTT  | CCGUUGTGCTGCGAGAGTATTA   | CGCUUCAGGTAGTAGTACGCTCT     |
| 2            | CGTGAACCGTTATTTGGGTAC  | CGGCTCCTCCAATTAAGAA     | CGCUUGTGAACCGTTATTTGGG   | CGCUUGCCCTCCTCCAATTAAGAA    |
| 3            | CGTGACAGTGGCAGATATAAC  | CGGATCACTCCAATACTAGACTA | CGCUUGTGACAGTGGCAGATAT   | CGCUUGGATCACTCCAATACTAGACTA |
| 4            | CGAACTATGCTGACAGTACCG  | CAGAGTCCACTTCCCATAATG   | CGCUUGAATACTGCTGACAGTAC  | CGCUUAAAGAGTCCACTTCCCATA    |
| 5            | CGCGAGCGTACTATACATAAC  | CCTACGACTAGGAGATAGATG   | CCGUUGCGAGCGTACTATACAT   | CGCUUCTACGACTAGGAGATAG      |
| 6            | CGCAGGCAGATCGACCTAGTT  | CCCCTCGTACACAATGGATAA   | CGCUUGCAGGCAGATCGACCTA   | CGCUUCCCTCGTACACAATGGAA     |
| 7            | CGAGTTTATACTACAGTGCCG  | CGACTCCCCTTCTTGTAATG    | CGCUUGAGTTTATACTACAGTG   | CGCUUGACTCCCCTTCTTGTA       |
| 8            | CGTTGCCGFACTAGGGATACT  | CCAGACGGTCAAATCCTCTAA   | CGCUUGTTGCCGFACTAGGGAT   | CGCUUCAGACGGTCAAATCCTCT     |
| 9            | CGCCTGCGAATTAGCGGCAT   | CGAGGTA GCTCACTCCACATG  | CCGUUGCCTGCGAATTAGCGGA   | CGCUUGAGGTA GCTCACTCCAC     |
| 10           | CGTTGTTTAGTAAGTGGCACC  | CGTCTAAGATCCTATCACACG   | CGCUUGTTGTTTAGTAAGTGGC   | CGCUUGTCTAAGATCCTATCAC      |
| 11           | CCTGCGTTGAAGTGGCTTACT  | CTTGCCACTGGTCTGAATGG    | CCGUUCTGCGTTGAAGTGGCTT   | CGCUUTTGCCACTGGTCTGAA       |
| 12           | CGCTGATAATGCTGAGGACTA  | CATCAGGTCTGGAAGATTACG   | CGCUUGCTGATAATGCTGAGGA   | CGCUUATCAGGTCTGGAAGATT      |
| 13           | CCGCGGCTTACACAGACATTA  | CAGCCTACTCTTACAGATTGT   | CCGUUCGCGGCTTACACAGACA   | CGCUUAGCCTACTCTTACAGAT      |
| 14           | CGTATTTAGAATCCTGTGGCC  | CCTTTCAGAGGTCAGGTTGAT   | CGCUUGTATTTAGAATCCTGTG   | CGCUUCTTTCAGAGGTCAGGTTG     |
| 15           | CGCAGTTAATGTGATATGGCC  | CACGACTCTAGCATGTCTACG   | CGCUUGCAGTTAATGTGATATG   | CGCUUACGACTCTAGCATGTCT      |
| 16           | CGAACTTCAGAACCGTGTAC   | CTATCTTAGGAGGAGCTTCTG   | CGCUUGAACCTTCAGAACCGTGT  | CGCUUATCTTAGGAGGAGCTT       |
| 17           | CGAACCTTCCAGAACCGTGTAC | CCCCGCTAAGAGATATGGTGA   | CGCUUGAACCTTCCAGAACCGTGT | CGCUUCCCGCTAAGAGATATGG      |
| 32           | CGCAGAGATAATGGTGACATCT | CTGAGTATCACTTCTCTACG    | CGCUUGCAGAGATAATGGTGACA  | CGCUUAGTATCACTTCTCTCT       |
| 35           | CCTGTAGCGAAGTTCTCATAC  | CGGCCAAAGTGTTAATTTGCT   | CCGUUCTGTAGCGAAGTTCTCA   | CGCUUGGCCAAAGTTGTTAATTT     |
| 38           | CGTTGTAGGACGTATGATCTC  | CGCCCAATGTCCAATAGCTTA   | CGCUUGTTGTAGGACGTATGAT   | CGCUUGCCCAATGTCCAATAGC      |
| 45           | CCTGTGGATACATCGTTACTG  | CCGGCGCATCTGTTATCTAGT   | CGCUUCTGTGGATACATCGTTA   | CCGUUCGGCGCATCTGTTATCT      |
| 51           | CCCGTAGCGACAATCAGCTTA  | CGGCTCCATGTTGGAATTAT    | CCGUUCGTAGCGACAATCAGC    | CGCUUGGCTCCCATGTTGGAAT      |
| 53           | CCTGATACGAAGTCTTATGCC  | CCCTCGCTCGCAGTATAAATA   | CGCUUCTGATACGAAGTCTTAT   | CGCUUCCTCGCTCGCAGTATAA      |
| 57           | CTATACGGCAGTGGATCAGAT  | CCGAAGGCTAGTCCAAAATTG   | CGCUUTATACGGCAGTGGATCA   | CGCUUCGAAGGCTAGTCCAAA       |

Hybridization oligonucleotide design

| Mux sequence | Sequence as 3' oligo                                      |
|--------------|-----------------------------------------------------------|
| 1            | GTGCTGCGAGAGTATTATCTTGCACTTATGCTACCGTGACCTGCGAATCCAGTCT   |
| 2            | GTGAACCGTTATTTGGGTACTGCACTTATGCTACCGTGACCTGCGAATCCAGTCT   |
| 3            | GTGACAGTGGCAGATATACTGCACTTATGCTACCGTGACCTGCGAATCCAGTCT    |
| 4            | GAACTATGCTGACAGTACCGTGCACTTATGCTACCGTGACCTGCGAATCCAGTCT   |
| 5            | GCGAGCGTACTATACATAACTGCACTTATGCTACCGTGACCTGCGAATCCAGTCT   |
| 6            | GCAAGCAGATCGACCTAGTTGCACTTATGCTACCGTGACCTGCGAATCCAGTCT    |
| 7            | GAGTTTATACTACAGTCCGTTGCACTTATGCTACCGTGACCTGCGAATCCAGTCT   |
| 8            | GTTGCCGFACTAGGGATACTTGCACCTTATGCTACCGTGACCTGCGAATCCAGTCT  |
| 9            | GCCTGCGAATTAGCGGACATTGCACCTTATGCTACCGTGACCTGCGAATCCAGTCT  |
| 10           | GTTGTTTAGTAAGTGGCACCCTGCACTTATGCTACCGTGACCTGCGAATCCAGTCT  |
| 11           | CTGCGTTGAAGTGGCTTACTTGCACTTATGCTACCGTGACCTGCGAATCCAGTCT   |
| 12           | GCTGATAATGCTGAGGACTATGCACCTTATGCTACCGTGACCTGCGAATCCAGTCT  |
| 13           | CGCGGCTTACACAGACATTAATGCACCTTATGCTACCGTGACCTGCGAATCCAGTCT |
| 14           | GATTTTAGAATCCTGTGGCTGCACTTATGCTACCGTGACCTGCGAATCCAGTCT    |
| 15           | GCAGTTAATGTGATATGGCTGCACTTATGCTACCGTGACCTGCGAATCCAGTCT    |
| 16           |                                                           |
| 17           | GAAACCTTCCAGAACCGTGTGCACTTATGCTACCGTGACCTGCGAATCCAGTCT    |
| 32           | GCGAGAAATATGGTGACATCTTGCACTTATGCTACCGTGACCTGCGAATCCAGTCT  |
| 35           | CTGTAGCGAAGTTCTCATACTGCACTTATGCTACCGTGACCTGCGAATCCAGTCT   |
| 38           | GTTGTAGGACGTATGATCTCTGCACCTTATGCTACCGTGACCTGCGAATCCAGTCT  |
| 45           | CTGTGGATACATCGTTACTGTGCACTTATGCTACCGTGACCTGCGAATCCAGTCT   |
| 51           | CCGTAGCGACAATCAGCTTATGCACCTTATGCTACCGTGACCTGCGAATCCAGTCT  |
| 53           | CTGATACGAAGTCTTATGCCTGCACTTATGCTACCGTGACCTGCGAATCCAGTCT   |
| 57           | TATACGGCAGTGGATCAGATTGCACCTTATGCTACCGTGACCTGCGAATCCAGTCT  |

addTable 3. Recovery (%) for nine of the PEA assays after technology transfer. Recovery is presented for all assays of which a commercial antigen was available.

| Protein biomarker | Recovery (%) | Antigen supplier | Cat.no.    |
|-------------------|--------------|------------------|------------|
| CEA               | 58-79        | RnD Systems      | 4128-CM    |
| TFRC              | 84-87        | RnD Systems      | 2474-TR    |
| MIF               | 58-78        | RnD Systems      | 289-MF-002 |
| OPN               | 62-84        | RnD Systems      | 1433-OP    |
| IGF-2             | 106-109      | ProSpec*         | cyt-265    |
| NSE               | 95-107       | ProSpec*         | enz-324    |
| IL8               | 11-129       | RnD Systems      | 208-IL     |
| TFF3              | 92-120       | ProSpec*         | cyt-005    |
| s100A8            | 78-102       | ProSpec*         | pro-800    |

\*PROSPEC Protein Specialities

Table 4 – Antigen mixes. Overview of the composition of the 10 different antigen mixes used for the assay specific test. Each mix is made from PBS + 0.1% BSA with spike-in of antigens in a concentration of 10 nM. Unspecific mix indicates that the assay specific antigen is not present in the mix, whereas specific mix indicates that the assay specific antigen is present in the mix.

| TFRC unspecific mix (no. 1) |            | s100A8 unspecific mix (no. 2) |            |
|-----------------------------|------------|-------------------------------|------------|
| Antigen                     | Conc. (nM) | Antigen                       | Conc. (nM) |
| TFRC                        | 0          | TFRC                          | 10         |
| IGF-2                       | 10         | IGF-2                         | 10         |
| TIMP-1                      | 10         | TIMP-1                        | 10         |
| S100A8                      | 10         | S100A8                        | 0          |
| TGF-b1                      | 10         | TGF-b1                        | 10         |
| MIF unspecific mix (no.3)   |            | TFF-3 unspecific mix (no.4)   |            |
| Antigen                     | Conc. (nM) | Antigen                       | Conc. (nM) |
| MIF                         | 0          | MIF                           | 10         |
| OPN                         | 10         | OPN                           | 0          |
| TFF-3                       | 10         | TFF-3                         | 10         |
| NSE                         | 10         | NSE                           | 10         |
| CEA                         | 10         | CEA                           | 10         |
| IL-8                        | 10         | IL-8                          | 10         |
| CEA unspecific mix (no. 5)  |            | OPN unspecific mix (no. 6)    |            |
| Antigen                     | Conc. (nM) | Antigen                       | Conc. (nM) |
| MIF                         | 10         | MIF                           | 10         |
| OPN                         | 10         | OPN                           | 0          |
| TFF-3                       | 10         | TFF-3                         | 10         |
| NSE                         | 10         | NSE                           | 10         |
| CEA                         | 0          | CEA                           | 10         |
| IL-8                        | 10         | IL-8                          | 10         |
| IL-8 unspecific mix (no. 7) |            | NSE unspecific mix (no. 8)    |            |
| Antigen                     | Conc. (nM) | Antigen                       | Conc. (nM) |
| MIF                         | 10         | MIF                           | 10         |
| OPN                         | 10         | OPN                           | 10         |
| TFF-3                       | 10         | TFF-3                         | 10         |
| NSE                         | 10         | NSE                           | 10         |
| CEA                         | 10         | CEA                           | 0          |
| IL-8                        | 0          | IL-8                          | 10         |
| IL-8 unspecific mix (no. 9) |            | NSE unspecific mix (no. 10)   |            |
| Antigen                     | Conc. (nM) | Antigen                       | Conc. (nM) |
| TFRC                        | 10         | TFRC                          | 10         |
| IGF-2                       | 10         | IGF-2                         | 10         |
| TIMP-1                      | 0          | TIMP-1                        | 10         |
| S100A8                      | 10         | S100A8                        | 10         |
| TGF-b1                      | 10         | TGF-b1                        | 0          |

|        |            | Mix no. |       | Mix no.    |   |
|--------|------------|---------|-------|------------|---|
| TFRC   | Specific 1 | 2       | MIF   | Specific 1 | 4 |
|        | Specific 2 | 9       |       | Specific 2 | 5 |
|        | Specific 3 | 10      |       | Specific 3 | 6 |
|        | Unspecific | 1       |       | Unspecific | 3 |
| s100A8 | Specific 1 | 1       | TFF-3 | Specific 1 | 3 |
|        | Specific 2 | 9       |       | Specific 2 | 5 |
|        | Specific 3 | 10      |       | Specific 3 | 6 |
|        | Unspecific | 2       |       | Unspecific | 4 |
| CEA    | Specific 1 | 3       | IL-8  | Specific 1 | 5 |
|        | Specific 2 | 4       |       | Specific 2 | 6 |
|        | Specific 3 | 6       |       | Specific 3 | 8 |
|        | Unspecific | 5       |       | Unspecific | 7 |
| OPN    | Specific 1 | 4       | NSE   | Specific 1 | 5 |
|        | Specific 2 | 5       |       | Specific 2 | 6 |
|        | Specific 3 | 7       |       | Specific 3 | 7 |
|        | Unspecific | 6       |       | Unspecific | 8 |

addTable 5 – Correlation Coefficients (R) between ELISA and PLA as well as ELISA and PEA. These results are calculated on the basis of ELISA, PLA and PEA analysis performed on both healthy individuals (n=70) and CRC patients (n=70) in order to complete an assessment of the newer techniques in comparison to the gold standard ELISA.

| Spearman correlation values (R) for ELISA, PLA and PEA data |              |              |            |
|-------------------------------------------------------------|--------------|--------------|------------|
| Protein biomarker (Panel no.)                               | PLA vs ELISA | PEA vs ELISA | PLA vs PEA |
| CEA mAb (1)                                                 | 0.90         | 0.98         | 0.91       |
| CEA mAb (3)                                                 | 0.95         | 0.96         | 0.73       |
| CEA pAb (1)                                                 | 0.59         | 0.80         | 0.47       |
| CEA pAb (2)                                                 | 0.34         | 0.59         | 0.30       |
| IL-8 (1)                                                    | 0.78         | 0.84         | 0.70       |
| IL-8 (2)                                                    | 0.82         | 0.73         | 0.60       |
| TIMP-1 (3)                                                  | 0.64         | 0.73         | 0.59       |
| TIMP-1 (4)                                                  | 0.53         | 0.75         | 0.52       |
| CA 242 (2)                                                  | 0.76         | 0.80         | 0.63       |
| SLPI (3)                                                    | -0.62        | -0.40        | 0.28       |
| VEGF (1)                                                    | 0.48         | 0.67         | 0.70       |

addTable 6. PLA- and PEA correlations. Presentation of the  $\chi^2$  statistic for the PLA and PEA covariates from the multivariate logistic regression analysis for each biomarker, modeling the probability for colorectal cancer versus healthy individual for each marker. The  $\chi^2$  value is largest for the PEA in all cases demonstrating that the PEA covariate is the best discriminator. The Pearson correlation coefficients demonstrate a substantial association between PLA and PEA levels.

| <b>N = 140</b> |                                  |                                  |                                             |
|----------------|----------------------------------|----------------------------------|---------------------------------------------|
|                | <b>PLA (<math>\chi^2</math>)</b> | <b>PEA (<math>\chi^2</math>)</b> | <b>Pearson Correlation Coefficient, (R)</b> |
| <b>CEA</b>     | 0.09                             | 4.45                             | 0.84                                        |
| <b>TFRC</b>    | 0.87                             | 7.89                             | 0.76                                        |
| <b>NSE</b>     | 6.91                             | 13.56                            | 0.89                                        |
| <b>CA19-9</b>  | 1.94                             | 10.77                            | 0.68                                        |
| <b>DcR3</b>    | 0.01                             | 2.26                             | 0.78                                        |
| <b>IL8</b>     | 2.32                             | 6.93                             | 0.52                                        |
| <b>MIF</b>     | 2.73                             | 12.54                            | 0.68                                        |
| <b>OPN</b>     | 3.34                             | 15.40                            | 0.53                                        |
| <b>CA242</b>   | 0.001                            | 8.39                             | 0.73                                        |
| <b>S100A8</b>  | 2.87                             | 14.64                            | 0.58                                        |
| <b>TIMP-1</b>  | 2.72                             | 14.74                            | 0.70                                        |
| <b>TFF3</b>    | 7.03                             | 13.87                            | 0.82                                        |

addTable 7 – Pearson correlation coefficients between the 12 potential CRC biomarkers, which were selected on a basis of a 0.01% discrimination. These numbers describe the association between markers. Markers with a strong correlation would likely not be independent in multivariate analysis.

| Pearson Correlation Coefficients, (R's) N = 280 |     |         |         |         |         |         |         |         |         |         |         |         |
|-------------------------------------------------|-----|---------|---------|---------|---------|---------|---------|---------|---------|---------|---------|---------|
|                                                 | CEA | TFRC    | NSE     | CA19-9  | DcR3    | IL8     | MIF     | OPN     | CA242   | S100A8  | TIMP-1  | TFF3    |
| CEA                                             |     | 0.20123 | 0.19181 | 0.31854 | 0.20352 | 0.23247 | 0.19131 | 0.24231 | 0.33619 | 0.22537 | 0.35350 | 0.41025 |
| TFRC                                            |     |         | 0.10077 | 0.21173 | 0.31353 | 0.19751 | 0.05902 | 0.40044 | 0.21524 | 0.24929 | 0.35091 | 0.28781 |
| NSE                                             |     |         |         | 0.17760 | 0.11241 | 0.32268 | 0.81213 | 0.21631 | 0.21594 | 0.24240 | 0.39015 | 0.22775 |
| CA19-9                                          |     |         |         |         | 0.11325 | 0.19818 | 0.19947 | 0.13937 | 0.61707 | 0.21747 | 0.23762 | 0.20692 |
| DcR3                                            |     |         |         |         |         | 0.41695 | 0.16487 | 0.24301 | 0.21049 | 0.22441 | 0.51373 | 0.40944 |
| IL8                                             |     |         |         |         |         |         | 0.28564 | 0.14189 | 0.42582 | 0.18626 | 0.41143 | 0.33886 |
| MIF                                             |     |         |         |         |         |         |         | 0.23503 | 0.17936 | 0.36859 | 0.42202 | 0.22968 |
| OPN                                             |     |         |         |         |         |         |         |         | 0.07882 | 0.22151 | 0.50318 | 0.40693 |
| CA242                                           |     |         |         |         |         |         |         |         |         | 0.22637 | 0.15761 | 0.23846 |
| S100A8                                          |     |         |         |         |         |         |         |         |         |         | 0.37432 | 0.26398 |
| TIMP-1                                          |     |         |         |         |         |         |         |         |         |         |         | 0.58855 |
| TFF3                                            |     |         |         |         |         |         |         |         |         |         |         |         |
